# Supplementary material
Source: publisher site journal article supplement (https://www.spandidos-publications.com/7496/downloadSupplementary)

Figure S1. Suppressive effects of AT in melanoma cells were not observed after the knockdown of PI3K expression. PI3K knockdown efficiency was verified via (A) PCR and (B) western blotting. (C) OD of B16 cells following incubation with Cell Counting Kit-8. Proliferation ability, stemness and migration capacity of B16 cells was measured via (D) colony formation assay, (E) sphere formation assay and (F) wound healing assay, respectively. \*\*\* $P < 0.001$  versus the Control group. AT, atractylenolide I; PI3K, phosphatidylinositol 3-kinase; OD, optical density; si, small interfering RNA.

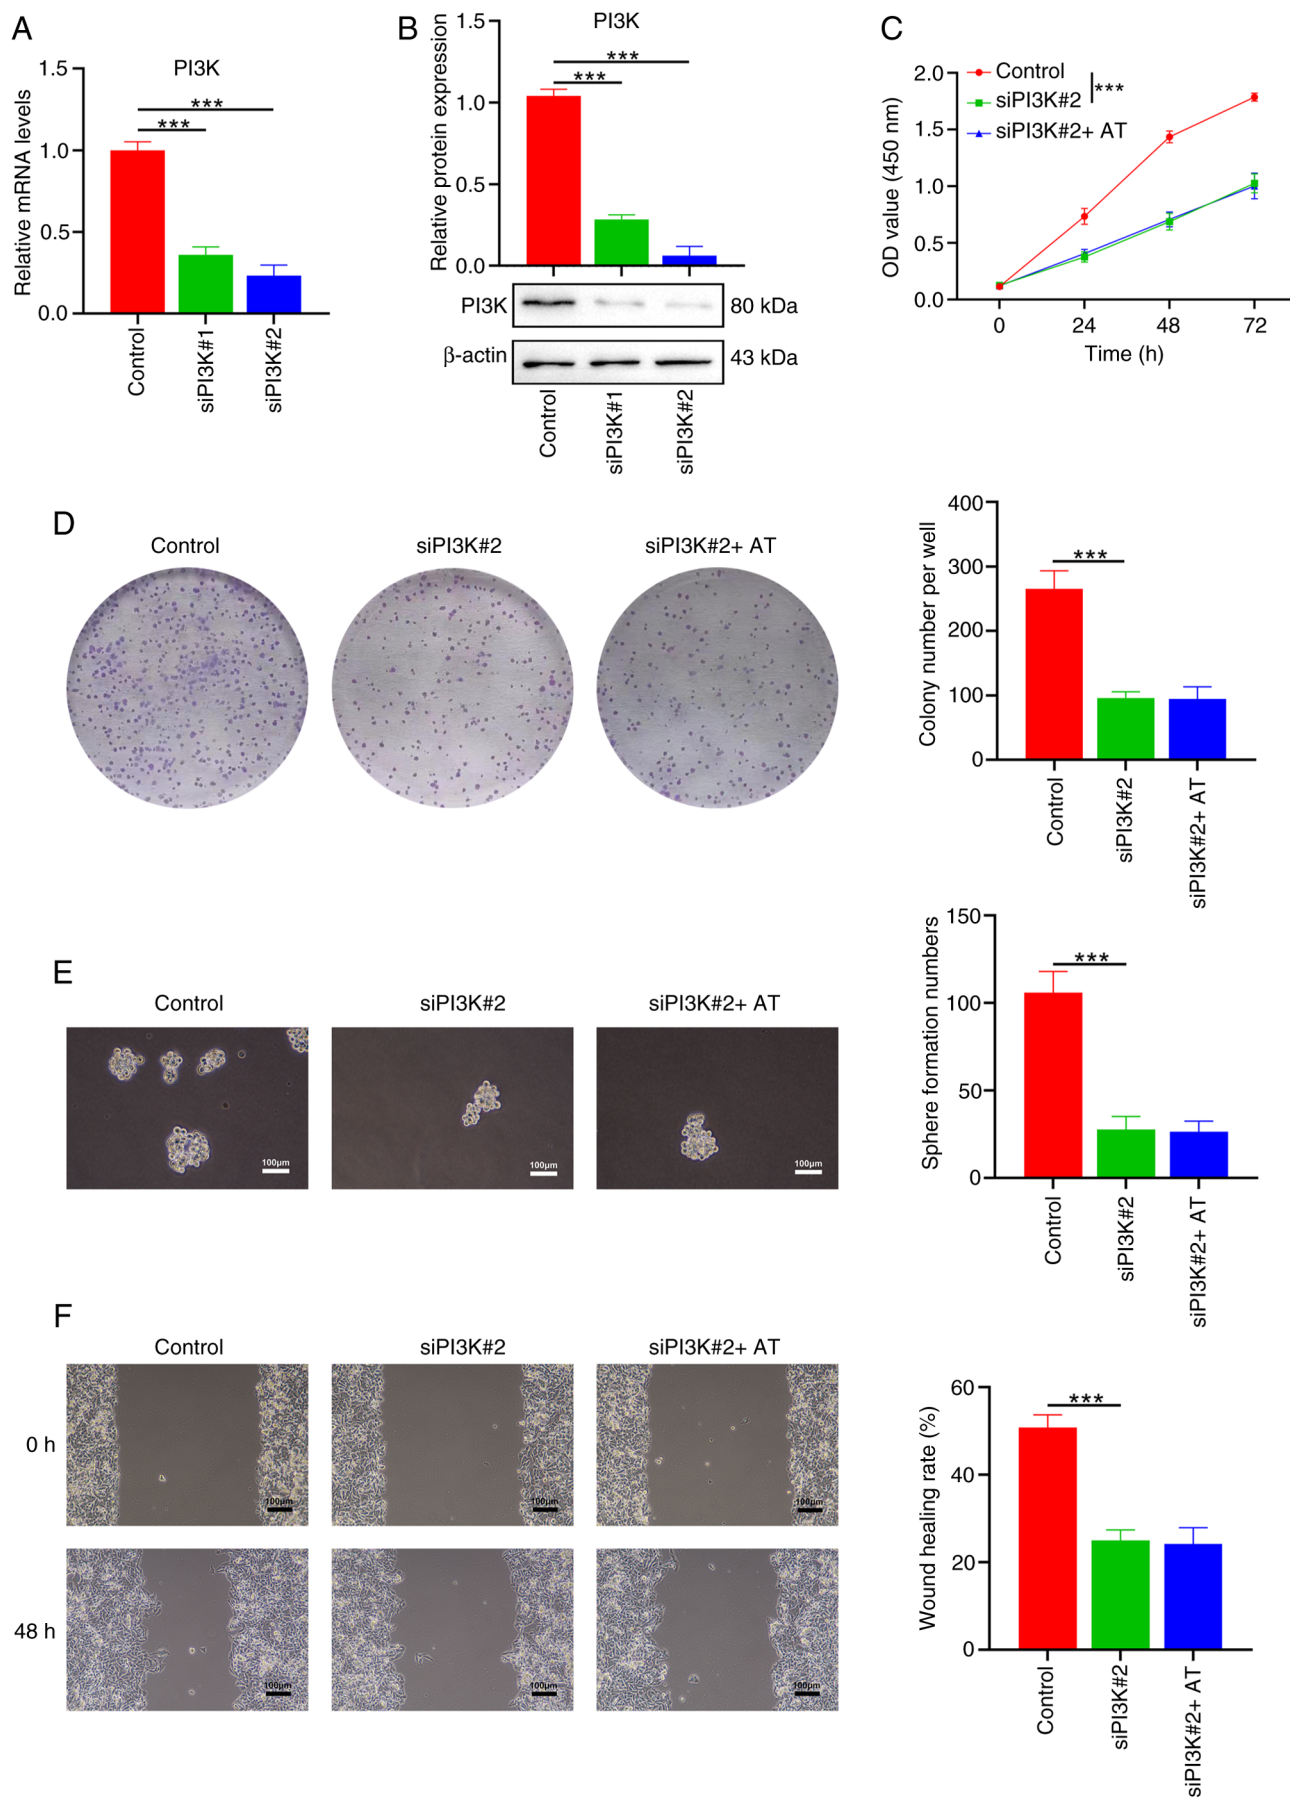

Supplement: Supplementary file 1 [file downloadSupplementary]
